# Supplementary material for: Synergistic Effect of Acetazolamide-(2-hydroxy)propyl β-Cyclodextrin in Timolol Liposomes for Decreasing and Prolonging Intraocular Pressure Levels
Source: MDPI journal article supplement (doi:10.3390/pharmaceutics13122010), 2021-11-25
Supplement: s1 [file s1]

# Supplementary Materials: Synergistic effect of acetazolamide-hydroxypropyl $\beta$ cyclodextrin in timolol liposomes for decreasing and prolonging the intra-ocular pressure levels

Carmen M. Arroyo-García, Daniela Quinteros, Santiago D. Palma, Cesáreo J. Jiménez de los Santos, José R. Moyano, Antonio M. Rabasco and María Luisa González-Rodríguez

**Table S1.** Stability study realized for three months at 4 °C. Mean  $\pm$  SD.

|                                | 0 months                          | 1 month          |                  |                  |                  | 3 months         |
|--------------------------------|-----------------------------------|------------------|------------------|------------------|------------------|------------------|
|                                |                                   | 7 days           | 14 days          | 21 days          | 30 days          |                  |
| <b>d<sub>H</sub> (nm)</b>      | <b>200.6 <math>\pm</math> 1.6</b> | 198.6 $\pm$ 2.10 | 197.1 $\pm$ 1.93 | 194.6 $\pm$ 2.72 | 193.2 $\pm$ 1.95 | 194.3 $\pm$ 2.52 |
| <b>PdI</b>                     | 0.13 $\pm$ 0.04                   | 0.15 $\pm$ 0.03  | 0.16 $\pm$ 0.04  | 0.14 $\pm$ 0.02  | 0.17 $\pm$ 0.03  | 0.17 $\pm$ 0.02  |
| <b><math>\zeta</math> (mV)</b> | 19.5 $\pm$ 0.3                    | 19.9 $\pm$ 0.4   | 19.6 $\pm$ 0.3   | 20.1 $\pm$ 0.3   | 20.1 $\pm$ 0.4   | 21.1 $\pm$ 0.2   |
| <b>EE TM (%)</b>               | 82.1 $\pm$ 1.32                   | 82.0 $\pm$ 1.37  | 82.1 $\pm$ 1.41  | 81.8 $\pm$ 2.34  | 80.1 $\pm$ 2.01  | 80.4 $\pm$ 1.78  |
| <b>EE Acz (%)</b>              | 72.6 $\pm$ 1.49                   | 72.3 $\pm$ 1.51  | 71.5 $\pm$ 2.12  | 70.6 $\pm$ 1.98  | 70.0 $\pm$ 1.37  | 69.6 $\pm$ 1.21  |

**Table S2.** Mean values of HP $\beta$ CD concentrations and acetazolamide (Acz) concentration dissolved in the presence of Acz/HP $\beta$ CD, Acz/HP $\beta$ CD/Ch or Acz/HP $\beta$ CD/Chems. These mean values ( $S_t$ ) and their SD are plotted in Figure 1a. Bold values represents  $S_0$ . Log ( $S_t-S_0$ ) mean values and their SD are also tabulated for each formulation and they are plotted in Figure 1b.

| HP $\beta$ CD | Acz/HP $\beta$ CD                 | Acz/HP $\beta$ CD/Ch              | Acz/HP $\beta$ CD/Chems           | Log( $S_t-S_0$ )<br>Acz/HP $\beta$ CD | Log( $S_t-S_0$ )<br>Acz/HP $\beta$ CD/Ch | Log( $S_t-S_0$ )<br>Acz/HP $\beta$ CD/Chems |
|---------------|-----------------------------------|-----------------------------------|-----------------------------------|---------------------------------------|------------------------------------------|---------------------------------------------|
| 0             | <b>3.48 <math>\pm</math> 0.18</b> | <b>2.57 <math>\pm</math> 0.15</b> | <b>2.94 <math>\pm</math> 0.15</b> | -                                     | -                                        | -                                           |
| 20            | 6.80 $\pm$ 0.30                   | 4.78 $\pm$ 0.13                   | 6.76 $\pm$ 0.12                   | 0.53 $\pm$ 0.02                       | 0.34 $\pm$ 0.02                          | 0.58 $\pm$ 0.01                             |
| 40            | 9.30 $\pm$ 0.12                   | 6.52 $\pm$ 0.12                   | 9.81 $\pm$ 0.21                   | 0.77 $\pm$ 0.01                       | 0.60 $\pm$ 0.01                          | 0.84 $\pm$ 0.00                             |
| 60            | 13.30 $\pm$ 0.46                  | 8.52 $\pm$ 0.20                   | 13.04 $\pm$ 0.17                  | 1.00 $\pm$ 0.02                       | 0.77 $\pm$ 0.00                          | 1.00 $\pm$ 0.01                             |
| 80            | 16.30 $\pm$ 0.70                  | 11.10 $\pm$ 0.26                  | 15.25 $\pm$ 0.22                  | 1.11 $\pm$ 0.02                       | 0.93 $\pm$ 0.01                          | 1.09 $\pm$ 0.01                             |
| 100           | 19.40 $\pm$ 0.10                  | 13.70 $\pm$ 0.72                  | 18.89 $\pm$ 0.19                  | 1.20 $\pm$ 0.01                       | 1.05 $\pm$ 0.02                          | 1.20 $\pm$ 0.00                             |
